# Supplementary material for: Aminoglycoside or Polymyxin Monotherapy for Treating Complicated Urinary Tract Infections Caused by Extensively Drug-Resistant Pseudomonas aeruginosa: A Propensity Score-Adjusted and Matched Cohort Study
Source: PubMed Central journal article supplement — Infect Dis Ther. 2021 Dec 3;11(1):335–50. doi: 10.1007/s40121-021-00570-z (PMC8847631; doi:10.1007/s40121-021-00570-z), 2021-12-03
Supplement: 40121_2021_570_MOESM1_ESM.pdf [file 40121_2021_570_MOESM1_ESM.pdf]

## **SUPPLEMENTARY MATERIAL**

**Table S1. Checklist of items according to STROBE document**

**Table S2. Susceptibility of 101 isolates of extensively drug-resistant *Pseudomonas aeruginosa* to different antimicrobial agents, according to EUCAST criteria.**

**Table S3. Sensitivity Analyses for the monotherapy with amikacin or CMS versus other antibiotic treatments.**

**Table S4. Microbiology and drug safety outcomes, comparing amikacin or CMS with other antibiotic treatments in overall and propensity-matched cohorts.**

**Table S1.** Checklist of items according to STROBE document.

|                              | <b>Recommendation</b>                                                                                                                                                                | <b>Assessment in article</b>                                                                                                                                                                                                   |
|------------------------------|--------------------------------------------------------------------------------------------------------------------------------------------------------------------------------------|--------------------------------------------------------------------------------------------------------------------------------------------------------------------------------------------------------------------------------|
| Title and abstract           | (a) Indicate the study design with a commonly used term in the title or abstract                                                                                                     | Study design specified in title and abstract                                                                                                                                                                                   |
|                              | (b) Provide an informative and balanced summary in the abstract of what was done and what was found                                                                                  | Balanced summary included in the abstract                                                                                                                                                                                      |
| Background/<br>rationale     | Explain the scientific background and rationale for the investigation being reported                                                                                                 | The scientific background and rationale are included in the Introduction                                                                                                                                                       |
| Objectives                   | State specific objectives, including any pre-specified hypotheses                                                                                                                    | Pre-specified hypothesis and objectives are stated in the Introduction                                                                                                                                                         |
| Study design                 | Present key elements of study design early in the paper                                                                                                                              | Study design described in the first part of Methods                                                                                                                                                                            |
| Setting                      | Describe the setting, locations, and relevant dates, including periods of recruitment, exposure, follow-up, and data collection                                                      | Described in Methods                                                                                                                                                                                                           |
| Participants                 | (a) Give the eligibility criteria and the sources and methods of selection of participants. Describe methods of follow-up                                                            | Described in Methods                                                                                                                                                                                                           |
|                              | (b) For matched studies, give matching criteria and number of exposed and unexposed                                                                                                  | This is not a matched study                                                                                                                                                                                                    |
| Variables                    | Clearly define all outcomes, exposures, predictors, potential confounders and effect modifiers. Give diagnostic criteria, if applicable                                              | Defined in Methods                                                                                                                                                                                                             |
| Data sources/<br>measurement | For each variable of interest, give sources of data and details of methods of assessment (measurement). Describe comparability of assessment methods if there is more than one group | Specified in Methods. The same methods for data collection of data were used in the groups.                                                                                                                                    |
| Bias                         | Describe any efforts to address potential sources of bias                                                                                                                            | Selection bias: inclusion of consecutive cases.<br>Information bias: use of well defined, standard, easy to collect variables.<br>Use of soft and hard outcome variables.<br>Indication bias: use of propensity score analysis |
| Study size                   | Explain how the study size was arrived at                                                                                                                                            | The attempted sample size was specified in Methods                                                                                                                                                                             |
| Quantitative variables       | Explain how quantitative variables were handled in the analyses. If applicable, describe which groupings were chosen and why                                                         | Quantitative variables were handled as such. No groupings were made                                                                                                                                                            |
| Statistical methods          | (a) Describe all statistical methods, including those used to control for confounding                                                                                                | Included in Methods                                                                                                                                                                                                            |

|                  |                                                                                                                                                                                                              |                                                                                                                                                 |
|------------------|--------------------------------------------------------------------------------------------------------------------------------------------------------------------------------------------------------------|-------------------------------------------------------------------------------------------------------------------------------------------------|
|                  | (b) Describe any methods used to examine subgroups and interactions                                                                                                                                          | Included in Methods                                                                                                                             |
|                  | (c) Explain how missing data were addressed                                                                                                                                                                  | Patients with missing data in the studied outcomes were excluded                                                                                |
|                  | (d) If applicable, explain how loss to follow-up was addressed                                                                                                                                               | Patients with loss of follow-up were excluded                                                                                                   |
|                  | (e) Describe any sensitivity analyses                                                                                                                                                                        | Included in Methods and supplementary table 3                                                                                                   |
| Participants     | (a) Report numbers of individuals at each stage of study—eg numbers potentially eligible, examined for eligibility, confirmed eligible, included in the study, completing follow-up, and analysed            | Included in Results (Figure 1)                                                                                                                  |
|                  | (b) Give reasons for non-participation at each stage                                                                                                                                                         | Specified in Figure 1                                                                                                                           |
|                  | (c) Consider use of a flow diagram                                                                                                                                                                           | Figure 1                                                                                                                                        |
| Descriptive data | (a) Give characteristics of study participants (eg demographic, clinical, social) and information on exposures and potential confounders                                                                     | Table 1                                                                                                                                         |
|                  | (b) Indicate number of participants with missing data for each variable of interest                                                                                                                          | Figure 1                                                                                                                                        |
|                  | (c) Summarise follow-up time (eg, average and total amount)                                                                                                                                                  | Information for 90 days was available from all included patients                                                                                |
| Outcome data     | Report numbers of outcome events or summary measures over time                                                                                                                                               | For clinical failure and mortality outcome: specified in Results (text)<br>For microbiological assessment and adverse events outcome: Table S3. |
| Main results     | (a) Give unadjusted estimates and, if applicable, confounder-adjusted estimates and their precision (eg, 95% confidence interval). Make clear which confounders were adjusted for and why they were included | Specified in Results (Tables 2, 3, S3)                                                                                                          |
|                  | (b) Report category boundaries when continuous variables were categorized                                                                                                                                    | Continuous variables were not categorized                                                                                                       |
|                  | (c) If relevant, consider translating estimates of relative risk into absolute risk for a meaningful time period                                                                                             | Not applicable                                                                                                                                  |
| Other analyses   | Report other analyses done—eg analyses of subgroups and interactions, and sensitivity analyses                                                                                                               | Specified in Results and supplementary table 3                                                                                                  |
| Key results      | Summarise key results with reference to study objectives                                                                                                                                                     | Specified in Abstract and Discussion                                                                                                            |
| Limitations      | Discuss limitations of the study, taking into account sources of potential bias or imprecision. Discuss both direction and magnitude of any potential bias                                                   | Included in Discussion                                                                                                                          |
| Interpretation   | Give a cautious overall interpretation of results considering objectives, limitations, multiplicity of analyses, results from similar studies, and other relevant evidence                                   | Included in Discussion                                                                                                                          |

|                  |                                                                                                                                                               |                        |
|------------------|---------------------------------------------------------------------------------------------------------------------------------------------------------------|------------------------|
| Generalisability | Discuss the generalisability (external validity) of the study results                                                                                         | Included in Discussion |
| Funding          | Give the source of funding and the role of the funders for the present study and, if applicable, for the original study on which the present article is based | Included               |

**Table S2. Susceptibility of 101 isolates of extensively drug-resistant *Pseudomonas aeruginosa* to different antimicrobial agents, according to EUCAST criteria.**

| <b>Antimicrobial agent</b> | <b>No. (%) of susceptible isolates</b> | <b>No. (%) of resistant isolates</b> |
|----------------------------|----------------------------------------|--------------------------------------|
| Aztreonam                  | 1 (1)                                  | 15 (14.9)                            |
| Ceftazidime                | 1 (1)                                  | 93 (92.1)                            |
| Cefepime                   | 1 (1)                                  | 89 (88.1)                            |
| Piperacillin-tazobactam    | 0 (0)                                  | 101 (0)                              |
| Imipenem                   | 1 (1)                                  | 94 (93.1)                            |
| Meropenem                  | 1 (1)                                  | 75 (74.3)                            |
| Ciprofloxacin              | 0 (0)                                  | 101 (0)                              |
| Amikacin                   | 43 (42.6)                              | 16 (15.8)                            |
| Gentamicin                 | 0 (0)                                  | 101 (0)                              |
| Tobramycin                 | 2 (2)                                  | 99 (98)                              |
| Colistin                   | 101 (100)                              | 0 (0)                                |

**Table S3.** Sensitivity Analyses for the monotherapy with amikacin or CMS Versus other antibiotic treatments.

| <b>Outcome</b>                                                                                                                                                                               | <b>Adjusted OR (95% CI)</b> | <b>p value</b> |
|----------------------------------------------------------------------------------------------------------------------------------------------------------------------------------------------|-----------------------------|----------------|
| <b>Clinical failure at Day 7</b>                                                                                                                                                             |                             |                |
| Age (years), m (IQR)                                                                                                                                                                         | 1.08 (0.99-1.17)            | 0.058          |
| Charlson comorbidity index, m (IQR)                                                                                                                                                          | 1.27 (0.88-1.83)            | 0.201          |
| SOFA score, m (IQR)                                                                                                                                                                          | 1.12 (0.77-1.63)            | 0.548          |
| Amikacin or CMS treatment                                                                                                                                                                    | 1.88 (0.31-10.79)           | 0.508          |
| <b>Clinical failure at End of treatment</b>                                                                                                                                                  |                             |                |
| Age (years), m (IQR)                                                                                                                                                                         | 1.08 (1.01-1.17)            | <b>0.045</b>   |
| Charlson comorbidity index, m (IQR)                                                                                                                                                          | 1.14 (0.79-1.64)            | 0.487          |
| SOFA score, m (IQR)                                                                                                                                                                          | 1.1 (0.76-1.62)             | 0.626          |
| Amikacin or CMS treatment                                                                                                                                                                    | 5.04 (0.53-47.84)           | 0.159          |
| <b>Outcome</b>                                                                                                                                                                               |                             |                |
| <b>Adjusted HR (95% CI)</b>                                                                                                                                                                  |                             |                |
| <b>p value</b>                                                                                                                                                                               |                             |                |
| <b>30-day mortality</b>                                                                                                                                                                      |                             |                |
| Age (years), m (IQR)                                                                                                                                                                         | 1.4 (1.06-1.84)             | <b>0.018</b>   |
| Charlson comorbidity index, m (IQR)                                                                                                                                                          | 3.07 (0.87-10.89)           | 0.082          |
| SOFA score, m (IQR)                                                                                                                                                                          | 1.77 (1.01-3.1)             | <b>0.047</b>   |
| Amikacin or CMS treatment                                                                                                                                                                    | 11.64 (0.3-447.8)           | 0.188          |
| <b>90-day mortality</b>                                                                                                                                                                      |                             |                |
| Age (years), m (IQR)                                                                                                                                                                         | 1.07 (0.99-1.14)            | 0.078          |
| Charlson comorbidity index, m (IQR)                                                                                                                                                          | 1.46 (1.09-1.96)            | <b>0.012</b>   |
| SOFA score, m (IQR)                                                                                                                                                                          | 1.4 (1.06-1.85)             | <b>0.017</b>   |
| Amikacin or CMS treatment                                                                                                                                                                    | 0.73 (0.22-2.43)            | 0.607          |
| Abbreviations: CMS (colistimethate sodium), SOFA (Sequential Organ Failure Assessment), m (median), IQR (interquartile range), OR (Odds Ratio), HR (Hazard Ratio), CI (confidence interval). |                             |                |

**Table S4.** Microbiology and drug safety outcomes, comparing amikacin or CMS with other antibiotic treatments in overall and propensity-matched cohorts.

| Outcome                                    | Overall cohort                          |                                |                   | Propensity-matched cohorts |                           |
|--------------------------------------------|-----------------------------------------|--------------------------------|-------------------|----------------------------|---------------------------|
|                                            | Amikacin or CMS treatment (n=48), n (%) | Other treatments (n=53), n (%) | OR (95% CI)       | AOR <sup>2</sup> (95% CI)  | AOR <sup>3</sup> (95% CI) |
| <b>Microbiology assessment<sup>1</sup></b> |                                         |                                |                   |                            |                           |
| Microbiological clearance                  | 18 (51.4)                               | 33 (78.6)                      | 0.29 (0.11-0.78)  | 0.43 (0.14-1.36)           | 0.72 (0.33-1.58)          |
| Emergence of resistance                    | 4 (13.3)                                | 1 (3.23)                       | 4.62 (0.48-43.94) |                            |                           |
| Relapse                                    | 6 (12.5)                                | 12 (22.6)                      | 0.49 (0.17-1.42)  |                            |                           |
| Reinfection                                | 10 (20.8)                               | 14 (26.4)                      | 0.73 (0.29-1.85)  |                            |                           |
| <b>Adverse events</b>                      |                                         |                                |                   |                            |                           |
| Acute kidney injury                        | 9 (18.8)                                | 18 (34)                        | 0.45 (0.18-1.13)  |                            |                           |
| RIFLE-R                                    | 5 (55.6)                                | 9 (50)                         | 1.25 (0.25-6.23)  |                            |                           |
| RIFLE-I                                    | 1 (11.1)                                | 4 (22.2)                       | 0.44 (0.04-4.62)  |                            |                           |
| RIFLE-F or more                            | 3 (33.3)                                | 5 (27.8)                       | 1.3 (0.23-7.32)   |                            |                           |
| <i>Clostridioides difficile</i> infection  | 0 (0)                                   | 6 (11.3)                       | -                 |                            |                           |
| Other side effects <sup>4</sup>            | 1 (1.9)                                 | 1 (2.1)                        | 1.11 (0.07-18.19) |                            |                           |

Abbreviations: CMS (colistimethate sodium), OR (Odds Ratio), AOR (adjusted Odds Ratio), CI (confidence interval).

<sup>1</sup> In patients who had a follow-up urine culture, N=51.

<sup>2</sup> Variables included in the adjustment model: age, Charlson comorbidity index, SOFA (Sequential Organ Failure Assessment) score, amikacin or CMS treatment group, and propensity score.

<sup>3</sup> Variables included in the adjustment model: age, Charlson comorbidity index, SOFA (Sequential Organ Failure Assessment) score, and amikacin or CMS treatment group.

<sup>4</sup> One patient treated with CMS developed a generalized rash, and another in the non-colistin, amikacin monotherapy group, hematologic cytopenia.
